# Supplementary material for: NF-κB-inducing kinase is a key regulator of inflammation-induced and tumour-associated angiogenesis
Source: PubMed Central journal article supplement — J Pathol. 2014 Aug 28;234(3):375–85. doi: 10.1002/path.4403 (PMC4194146; doi:10.1002/path.4403), 2014-08-28

Figure S1, related to Figure 1.

**A**

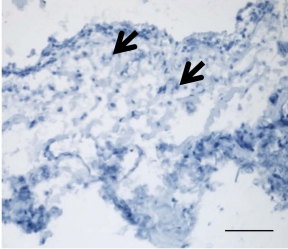

**B**

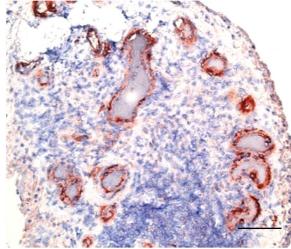

**C**

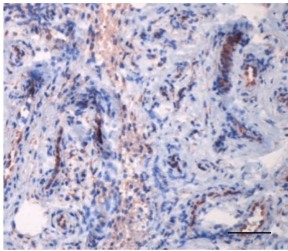

**D**

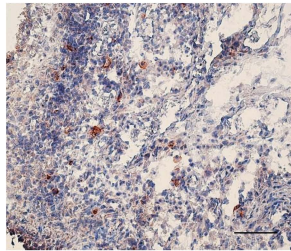

Figure S2, related to Figure 2.

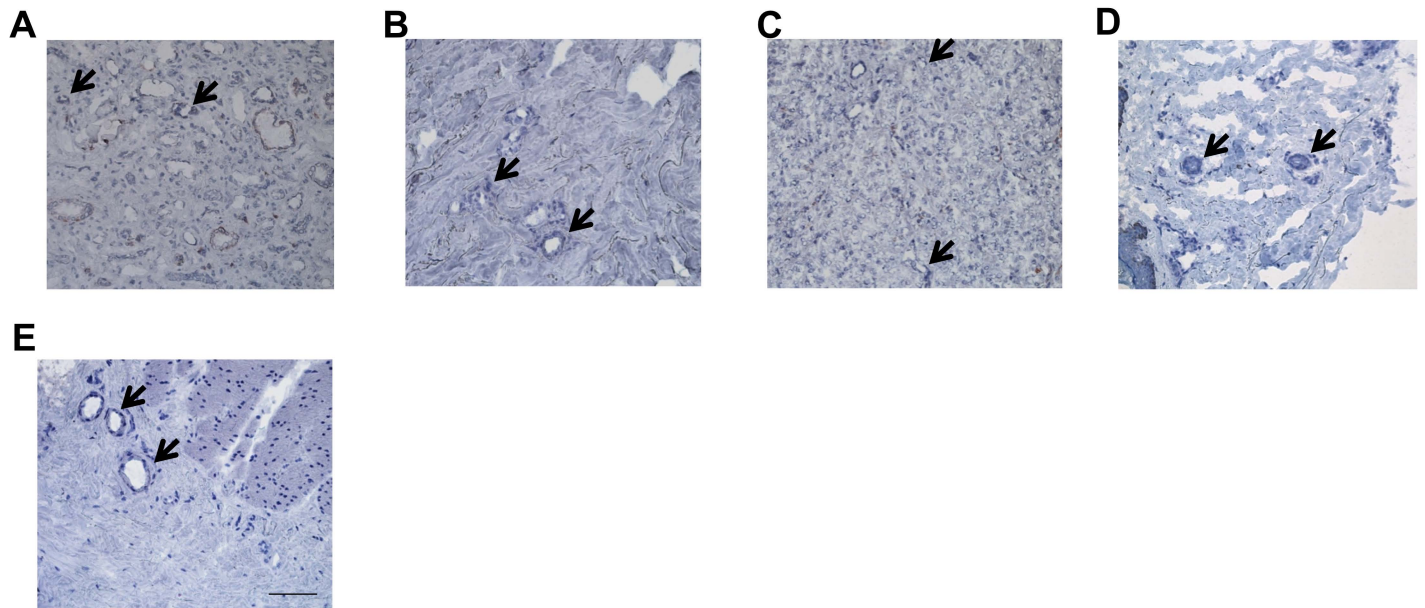

Figure S3, related to Figure 3.

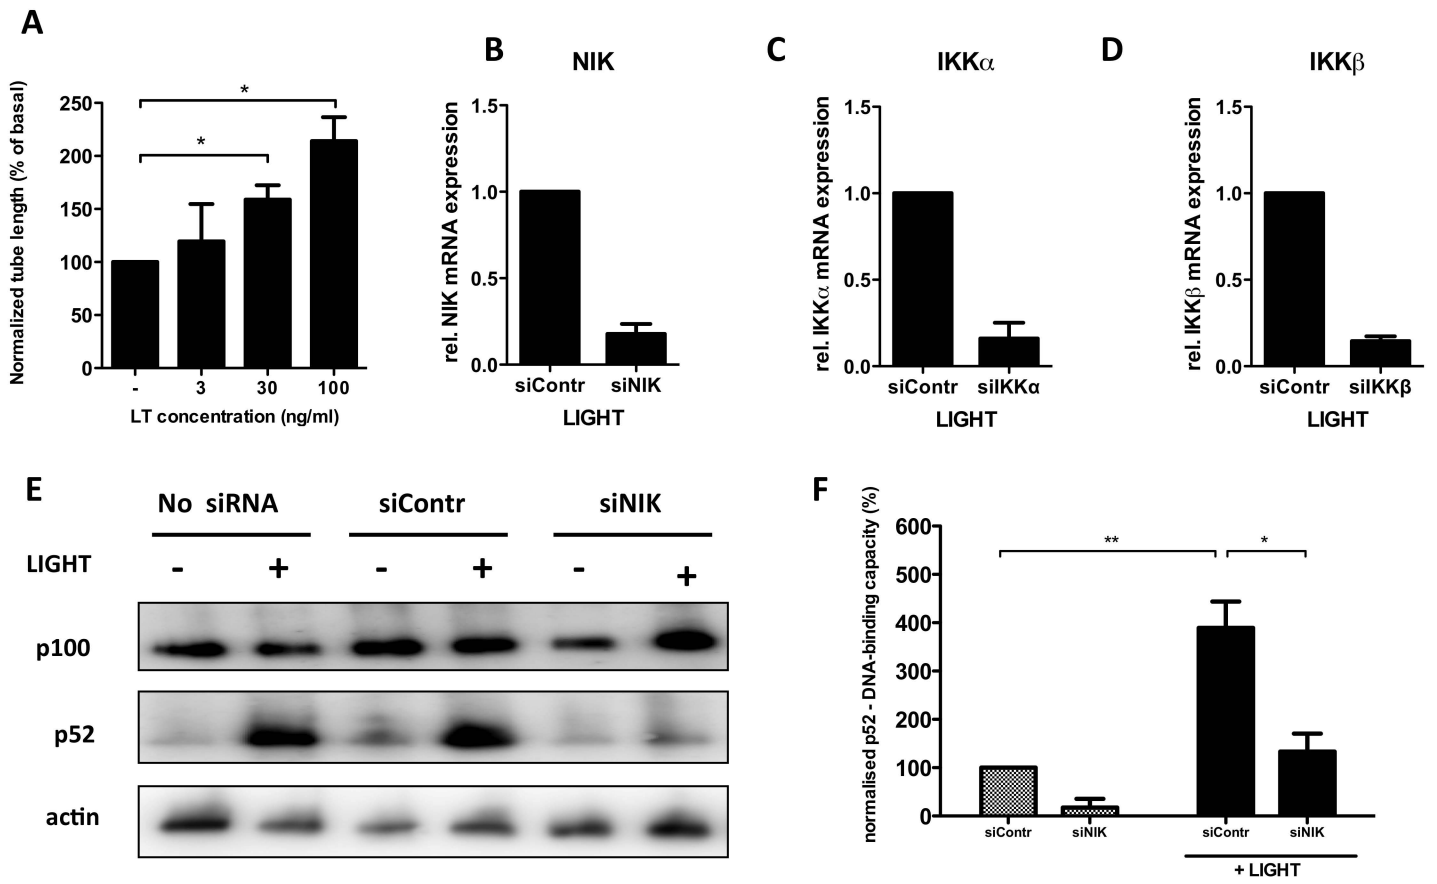

Figure S4, related to Figure 4.

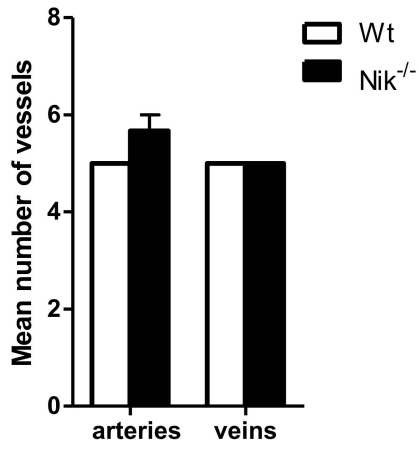

Supplement: NIHMS612854-supplement-Supp_FigureS1-S4.pdf [file NIHMS612854-supplement-Supp_FigureS1-S4.pdf]
